# Supplementary material
Source: Springer Nature journal article supplement (https://www.springermedizin.de/resource/supplementary/13256_2012_2173_MOESM3_ESM.pdf/9649112)

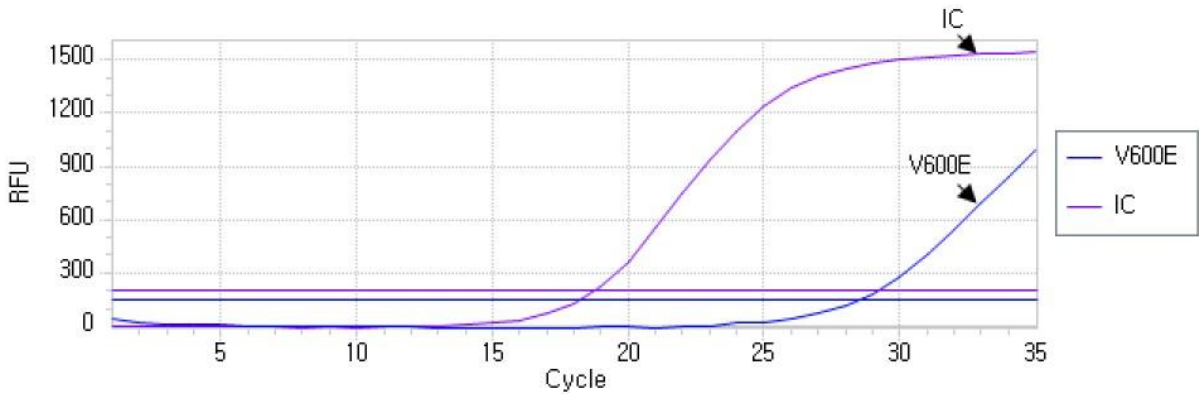

Supplement: MOESM3 [file 9649112]
